1 **Nine high-quality *Anas* genomes provide new insights into *Anas* evolution and**  
2 **domestication.**

3

4 Zhou Zhang<sup>1,2</sup>, Zijia Ni<sup>1</sup>, Te Li<sup>1</sup>, Mengfei Ning<sup>1</sup>, Chuze Gao<sup>1</sup>, Jiaxiang Hu<sup>1</sup>, Mengying  
5 Han<sup>1</sup>, Jiawen Yang<sup>2</sup>, Fusheng Wu<sup>2</sup>, Li Chen<sup>3</sup>, Lizhi Lu<sup>3</sup>, Zhongzi Wu<sup>2</sup>, Huashui Ai<sup>2</sup>,  
6 Yinhua Huang<sup>1,\*</sup>.

7 <sup>1</sup>State Key Laboratory for Farm Animal Biotech Breeding, College of Biology Sciences,  
8 China Agricultural University, Beijing, China; <sup>2</sup>National Key Laboratory for Swine  
9 Genetic Improvement and Production Technology, Jiangxi Agricultural University,  
10 Nanchang, China; <sup>3</sup>Institute of Animal Husbandry and Veterinary Medicine, Zhejiang  
11 Academy of Agricultural Sciences, Hangzhou, Zhejiang, China.

12

13 \* Yinhua Huang.

14 **Email:** cauhyh@cau.edu.cn

15

16 **Abstract**

17 The evolutionary origin and genetic architecture of domestic animals are becoming more  
18 tractable as the availability of more domestic species genomes. Evolutionary studies of  
19 wild and domestic organisms have yielded many fascinating discoveries, while the stories  
20 behind the species diversity of *Anas* or the domestication of duck were largely unknown.  
21 Here, we assembled eight chromosome-level *Anas* genomes. Together with our recently  
22 available Pekin duck genome, we investigated *Anas* phylogeny, genetic differentiation,  
23 and gene flow. Extensive phylogenetic inconsistencies were observed in *Anas* genomes,  
24 particularly two phylogeny conflicts between autosome and Z-chromosome. However,  
25 the Z chromosome was less impacted by introgression and more suitable to elucidate  
26 phylogenetic relationships than autosomes. From the Z-chromosome perspective, we  
27 found that the speciation of *Anas platyrhynchos* and *Anas zonorhyncha* accompanied  
28 with female-biased gene flow, and remodeled duck domestication history. Moreover, we  
29 constructed an *Anas* pan-genome and identified several differentiated SVs between  
30 domestic and wild ducks. These SVs might act as repressors/enhancers to regulate their  
31 neighboring genes (i.e., *GHR* and *FER*), which represented the promising "domestication  
32 genes". Additionally, *Anas* genomes were found being presented LTR retrotransposon  
33 bursts, which might largely contribute to functional shifts of genes involved in duck  
34 domestication (i.e., *MITF* and *IGF2BP1*). This study opens a new window to unravel  
35 avian speciation and domestication from Z chromosome.

36 **Main Text**

37

38 **Introduction**

39

40 Understanding the evolutionary processes of organisms in natural and domestic  
41 environments is of great interest. Domesticated organisms serve as models for studying  
42 evolution (i.e., natural selection and gene flow) and rules of inheritance (1). They also  
43 provide plenty of food to human beings and contribute to the development of permanent  
44 human societies. However, domesticated organisms demonstrate limited genetic diversity  
45 due to intensive selective breeding, which hinders their trait improvements and reduces  
46 their adaptability and resilience (2–4). Recent studies have aimed to increase genetic  
47 diversity in domesticated organisms by introducing genetic resources from related wild  
48 species and exploring functional variations within those species (5–7). This approach has  
49 been challenging in animals, mainly due to the difficulties of cross-species hybridization  
50 (8), the limited species diversity of their wild relatives(9) and few functional variations  
51 being explored.

52 Duck, a general name for *Anas* and other Anatidae species, is globally distributed  
53 and exhibit diverse phenotypes, with the majority being migratory and sexually  
54 dimorphic. *Anas* is one of the largest avian genera (10), and domestic duck contains a  
55 large variety of breeds (<https://www.fao.org/dad-is/>). Duck, especially the mallard, has  
56 the extensive cross-species hybridization capabilities, i.e., 82 hybrid combinations related  
57 to mallard, and 576 hybrid combinations related to *Anas* were recorded ([http://www.bird-](http://www.bird-hybrids.com/)  
58 [hybrids.com/](http://www.bird-hybrids.com/)). This enables duck to have the feasibility of cross-species breeding.  
59 Therefore, duck provides a good model for unravelling the complex processes of animal  
60 phylogeny, evolution, and domestication. The mallard was suggested as the ancestor of  
61 domestic ducks, and three genes (*MITF*, *IGF2BP1* and *NR2F2*) were inferred to  
62 contribute to the formation of the Pekin duck (11–13). However, the *Anas* evolution and

63 domestication are still unclear. Moreover, why a few wild *Anas* species (i.e., only mallard  
64 out of sympatric duck species) has been domesticated remains unknown (14).

65 In this study, we assembled high-quality genomes of one domestic duck and seven  
66 divergent wild ducks. Together with the recently available high-quality reference genome  
67 of Pekin duck (SKLA2.0), we performed comprehensive evolutionary analyses to  
68 understand the evolution and domestication of *Anas* species. We further constructed an  
69 SV-based pan-genome using these nine genomes and leveraged it to explore differential  
70 SVs between ducks, especially SVs diverging between domestic and wild ducks, and to  
71 investigate effect of SVs on functional genes during duck domestication. Moreover, we  
72 investigated the dynamics of transposon elements in duck genomes, with a special  
73 emphasis on their roles in duck domestication.

74

75

## 76 **Results**

77

78 **High-quality genome assemblies and annotations.** Genomic sequencing was performed  
79 on eight divergent ducks from the *Anas* genus, including one domestic laying-type duck  
80 *Anas platyrhynchos* (Shaoxing, SX), and seven wild ducks, namely Mallard (*Anas*  
81 *platyrhynchos*, MA), Chinese spot-billed duck (*Anas zonorhyncha*, SB), Pintail (*Anas*  
82 *acuta*, AAC), Eurasian green-winged teal (*Anas crecca*, ACR), Falcated teal (*Anas*  
83 *falcata*, AFA), Northern shoveler (*Anas clypeata*, ACL), and Baikal teal (*Anas formosa*,  
84 AFO) (Fig. 1A, *SI Appendix*, Fig. S1). The genomes were assembled using normal/ultra-  
85 long Nanopore or Pacbio HiFi reads, as well as next generation sequencing (NGS) reads,  
86 BioNano and Hi-C data (*SI Appendix*, Fig. S2A, *SI Appendix*, Table S1). This effort

87 constructed eight highly continuous genomes anchored on 40 to 41 chromosomes. The  
88 contig N50 ranged from 11.9 to 32.8 Mb, and the scaffold N50 ranged from 67.2 to 77.6  
89 Mb (Fig. 1B, *SI*, Table S3). Quality evaluation indicated that eight duck genomes had  
90 high BUSCO (Benchmarking Universal Single-Copy Orthologs) values (95.5-96.3%),  
91 high consensus accuracy (QV) scores (46.5-50.5) and high mapping rates (99.56-99.81%)  
92 of population NGS reads (*SI Appendix*, Fig. S3A and *SI*, Table S4). These observations  
93 suggested that our eight duck assemblies were of high quality, with comparable  
94 contiguity and completeness to one of the one of the highest quality avian genomes (the  
95 chicken GRCg7b).

96 Gene annotation yielded 17,316-17,947 coding genes and 82,383-101,261  
97 transcripts, with less than 50% overlap with repeat sequences in eight assemblies. Less  
98 than 0.5% of genes contain gaps in their 10kb flanking regions, and all transcripts have  
99 high consistency to those of Pekin duck (SKLA2.0) and GRCg7b, with at least of 99%  
100 BUSCO values (Fig. S3 B-E). Moreover, eight assemblies contained 13.61-20.90%  
101 repeat elements. Among them, short interspersed nuclear elements (SINEs, accounting  
102 for ~0.05% of genome) were constant, while other four type transposable elements (TEs)  
103 were various (11.36-18.40%) across all genomes. Further analysis revealed miniature  
104 inverted-repeat transposable elements (MITEs) were substantially various, ranging from  
105 0.09% in ACL to 6.30% in SB, and contributing to 81 Mb of sequence variation (*SI*  
106 *Appendix*, Table S5).

107 **Conservation and differentiation of *Anas* genomes.** Whole genome alignment revealed  
108 *Anas* genomes were high syntenic, with a limited number of chromosome rearrangements

109 (Fig. 2A and *SI Appendix*, Fig. S4) and minimal chromosome length variation (*SI*  
110 *Appendix*, Table S6). Subsequently, we identified highly conserved elements (HCEs) and  
111 accelerated evolution elements (ACCs) of nine *Anas* species or two domestic ducks  
112 (Pekin and SX). In total, 432 (~0.7 Mb) domestic HCEs were observed only in domestic  
113 duck (Type I), and another 22,534 (~35.9 Mb) domestic HCEs had orthologous  
114 sequences in at least three wild species (Type II); 2,634 (~3.7 Mb) *Anas* HCEs were  
115 observed only in *Anas* (Type I) and another 214,201 (~77.0 Mb) *Anas* HCEs had  
116 orthologous sequences in at least three non-*Anas* species (Type II) (Fig. 2B). The Type I  
117 domestic HCEs were enriched in the 0-10 kb flanking regions of genes related to cell  
118 morphogenesis and axon guidance, which are known to be associated with domestication  
119 (15), while the Type I *Anas* HCEs were enriched in the 0-10 kb flanking regions of genes  
120 involved in the Asparagine N-linked glycosylation and protein phosphorylation pathway  
121 (*SI Appendix*, Fig. S5).

122         Aligning NGS data of eight ducks to their corresponding assemblies, we identified  
123 4.89-10.24 million SNPs and 0.78-1.54 million INDELs (referred as NGS-variants). We  
124 further extracted 2.95-12.79 million SNPs and 0.41-1.56 million INDELs (Cactus-  
125 variants) from the Cactus multi-alignment file of nine duck genomes. Many of these  
126 variants were functional mutations, such as 227-792 stop-gain and 540-1588 stop-loss in  
127 the Cactus variants (Fig. 2C and *SI Appendix*, Fig. S6 and S7). Notably, these variants,  
128 similar to repeat sequences, were enriched in the 0-10 kb gene flanking regions (Fig. 2D  
129 and *SI Appendix*, Fig. S8 A and B). To investigate the divergence between duck  
130 populations, the fixation index ( $F_{ST}$ ) was calculated for six population pairs. The  $F_{ST}$   
131 landscapes showed that two divergent patterns were presented in *Anas*. One was only

132 observed in the MA vs. SB pair (MA and SB primarily differed in male breeding  
133 coloration) and the dimorphism vs. monomorphism pair, where autosomes had small, but  
134 Z chromosome had large number of SNPs with high  $F_{ST}$  values ( $F_{ST} > 0.5$ ). Another was  
135 presented in the remained four *Anas* population pairs, where both autosomes and Z  
136 chromosomes had many SNPs with high  $F_{ST}$  values ( $F_{ST} > 0.5$ ) (Fig. 2E). These *Anas*  
137 divergent patterns were similar to patterns reviewed by Nosil et al (16). The former  
138 provided an example where speciation might occur with minimal genetic changes, similar  
139 to the findings in butterflies (17). While the latter suggested that both domestication and  
140 speciation, accompanied by morphological changes, occurred at numerous genetic loci,  
141 as observed in African cichlid fish (18). All comparisons, except the Five\_Outer vs. MA-  
142 SB, had a relatively small number of SNPs (92 to 10,923) were nearly fixed ( $F_{ST}$ : 0.9-  
143 1.0) (*SI Appendix*, Fig. S8C). This was consistent with models of polygenic adaptation  
144 from standing genetic variation (19). For ancient SNPs shared among populations, there  
145 was an increasing trend of the proportion of SNPs in the 0-10 kb gene flanking regions  
146 over increasing  $F_{ST}$  values (*SI Appendix*, Fig. S8 D and E). Taken together, these findings  
147 suggested that the gene regulatory regions might play a crucial role in duck speciation  
148 and domestication.

149 **Extensive phylogeny incongruence in *Anas* genomes.** To understand the Anatidae  
150 phylogeny, we constructed a phylogenetic tree for nine *Anas* species and sixteen non-  
151 *Anas* Anatidae species with four-fold degenerate sites (4d-sites) of their genomes and  
152 estimated their divergent time using the MCMTREE (*SI*, Table S7). This analysis  
153 revealed that *Anas* species diverged from Anserinae ~18.00 million years ago (Mya) and

154 underwent further divergence ~3.86 Mya, followed by the ACL and AFO divergence  
155 ~3.31 Mya (Fig. 3A). It was consistent with the divergence time estimated by the PSMC  
156 analysis, which indicated that *Anas* species diverged ~4 Mya and experienced two  
157 population declines that overlapped with the Xixiabangma Glaciation (XG, 0.8-1.17  
158 Mya) and the Last Glacial Period (LGP, 11.7-115 kya) (Fig. 3B). Since the Z  
159 chromosome always plays a disproportionately role in the evolutionary process (20), we  
160 further constructed an Anatidae phylogenetic tree using 4d-sites of the Z chromosome. In  
161 general, the phylogenetic tree based on 4d-sites of the Z chromosome was consistent to  
162 those of the whole-genomes and autosomes, except for the phylogenetic position of  
163 Anserinae and the relationship between ACR and AFA (Fig. 3C).

164 The avian genome has been largely affected by incomplete lineage sorting (ILS)  
165 (21), and the *Anas* have frequently hybridized (22). Both ILS and hybridization would  
166 disrupt local phylogenetic relationships (i.e., the inconsistency of autosome and Z  
167 chromosome 4d-site trees). To assess effects of ILS on *Anas* genomes, we generated local  
168 phylogenetic trees using various genome window sizes from 1 Mb to 1 kb. As the  
169 window size decreased, the support for autosomal and Z chromosome 4d-site trees  
170 decreased from 17.73% to 0.94% and from 26.74% to 5.41%, respectively. Notably, the  
171 local phylogenetic unstableness was mainly from the "Mallard complex" (including  
172 Pekin, SX, MA, and SB) (Fig. 3D). However, both the coalescent trees based on window  
173 and CDS trees of the autosomes were consistent to the autosome 4d-site tree. Similarly,  
174 the coalescent trees of the Z chromosome were consistent to the Z chromosome 4d-site  
175 tree (*SI Appendix*, Fig. S9). We further investigated the phylogenetic discordance at each  
176 node of the autosome/Z coalescent trees and found most nodes had one primary (t1: 0.19-



177 0.99) and two substantial ( $t_2$  and  $t_3$ : 0.00-0.62) alternative topologies. The discordances  
178 on N1 and N4 nodes showed symmetric distributions, suggesting that ILS occurred in  
179 these two nodes. While N2 and N3 nodes displayed relatively skewed distributions,  
180 suggesting that a combination of ILS and hybridization presented in these two nodes (Fig.  
181 3E). We then performed the  $D$ -statistic analysis on 154 four-population combinations ( $SI$ ,  
182 Table S8). Significant signals of gene flow ( $|Z| > 3$ ) were detected in 63.6% (98/154) of  
183 autosomal combinations and 28.6% (44/154) of Z chromosome combinations, including  
184 SB-domestic, AAC-domestic, AFA-AAC, ACR-AAC, and AAC-ACL (Fig. 3F).  
185 Compared to the autosomes, the Z chromosome had unusually higher  $|D|$  values of the  
186 combinations with ACR as pop2 and AFA as pop3. Considering the population  
187 expansion observed in the demographic history of ACR (Fig. 3B), and the autosomal/Z  
188 phylogenetic incongruence between ACR and AFA (Fig. 3C), it was likely that the ACR  
189 represented a sister species of the AFA as the Z-chromosome 4d-site tree indicated, and  
190 gene flow from an unknown species disrupted the autosomal phylogeny of ACR and  
191 caused its population expansion. In summary, hybridization and ILS resulted in extensive  
192 phylogenetic incongruences in *Anas*, making it a valuable model for phylogenetic studies.

193 **Speciation of the MA and SB, and inference of duck domestication history.** The Z  
194 chromosome sequences showed significantly lower  $|Z|$  values and a higher proportion of  
195 the primary topology in the *Anas*, implying that the Z chromosome was less influenced  
196 by gene flow or ILS (Fig. 3 E and F and *SI Appendix*, Fig. S10A). We then compared the  
197 population-level phylogenetic trees constructed using SNPs from the autosomes and the  
198 Z chromosome. The neighbor-joining (NJ) trees showed that some “misplaced MAs”

199 diverged from the other MAs (“correct MAs”) and clustered together with SBs when  
200 using autosomal SNPs, whereas all MAs were in a group and clearly diverged from SBs  
201 when using Z-chromosome SNPs (Fig. 4A, *SI Appendix*, Fig. S10B). Similarly, in the  
202 ADMIXTURE analysis, “misplaced MAs” could not distinguish from SBs when using  
203 autosomal SNPs. While all MAs clearly distinguished from SBs when using Z-  
204 chromosome SNPs, but “misplaced MAs” contained ~15% SB ancestry, when using Z-  
205 chromosome SNPs (K=5, 6). However, neither the autosomes nor the Z chromosome of  
206 SB contained the component of MA ancestry, indicating asymmetrical introgression from  
207 SB to MA (Fig. 4B, *SI Appendix*, Fig. S10 C and D).

208 To further understand the resistance of the Z chromosome to introgression, we  
209 performed the topology weighting analysis. This found that 74 of 258 windows (28.7%)  
210 were resistant to introgression using the threshold of weights > 0.5 for the topology of  
211 “(((IND-indigenous duck, Pekin), MA), SB), Outgroup)”. A significant resistant region  
212 spanned ~7.2 Mb and contained the critical *DMRT* loci known for their pivotal role in sex  
213 determination (23). Additionally, we found another resistant region that spanned ~0.3 Mb  
214 and contained *SLC24A2* gene associated to coat and skin color (24, 25), exhibited the  
215 highest MA-SB  $F_{ST}$  values (Fig. 4C, *SI*, Table S9). However, the highly differential sites  
216 between MA and SB did not change any amino acids in *SLC24A2* (Fig. 4D). Further  
217 comparison suggested that “correct MAs” and “misplaced MAs” shared the same  
218 introgression pattern, suggesting that the evolutionary displacement of “misplaced MAs”  
219 was likely due to unequal ancient introgression among MA populations rather than recent  
220 introgression (*SI Appendix*, Fig. S11). Based on the above analysis, we had a clear  
221 understanding of the duck domestication history and constructed an ideal model based

222 on: (1) the 4d-sites tree; (2) continuous asymmetric introgression from SB to MA after  
223 their split; and (3) an initial domestication stage with gene flow between MA and  
224 domestic ducks, as well as gene flow between SB and domestic ducks (*SI Appendix*, Fig.  
225 S12A). In the best-estimated model A, SB separated from MA ~142 kya with continuous  
226 migration from SB to MA. Ancestors of domestic ducks diverged from MA ~19 kya and  
227 the Pekin duck separated from the IND ~887 years ago (Fig. 4E).

228 **Construction of *Anas* pan-genome and identification of differential SV.** To create a  
229 representative reference genome, we used the Pekin (SKLA2.0) genome as the reference  
230 and constructed an *Anas* pan-genome with our new eight *Anas* genomes using the  
231 minigraph (26). This generated a pan-genome containing 698,568 nodes with a  
232 cumulative length of ~1,263 Mb. Among them, 179,439 (25.69%) nodes with a length of  
233 ~1,031 Mb (81.62%) were shared by nine ducks, and 259,506 (37.15%) nodes with a  
234 length of ~124 Mb (9.82%) were sourced from eight non-reference duck genomes (*SI*  
235 *Appendix*, Fig. S13 A-D). We evaluated this pan-genome quality using HiFi and  
236 Nanopore reads of nine *Anas* individuals for genomic assembly, which showed that  
237 mapping rates were ~98 % and ~70 %, respectively (*SI Appendix*, Fig. S13E). The SVs  
238 detected by aligning NGS data of nine *Anas* individuals for genomic assembly to the pan-  
239 genome (280,430 SVs, test set) were compared with those detected by whole-genome  
240 alignment between the reference genome (Pekin duck SKLA2.0) and new eight *Anas*  
241 non-reference genomes (208,148 SVs, base set), with an F1 score of 71.3%, recall of  
242 79.7%, and precision of 64.5% (*SI Appendix*, Fig. S13F). These results suggested that the  
243 pan-genome was of good quality, and suitable to identify SVs using NGS data.

244 To investigate how SVs contribute speciation and domestication, we identified SVs  
245 by aligning NGS reads from 200 individuals representing 22 duck species/breeds to the  
246 above *Anas* pan-genome. The overall genotyping rate for SVs in 234,931 loci was 0.70  
247 across all 200 samples. Among these SVs, 22,072 were shared by all *Anas* species, while  
248 5,261, 12,156, 14,764, 21,170 and 20,612 were specifically present in the ACA, ACR,  
249 AFA, ACL, and AFO, respectively (Fig. 5A, *SI Appendix*, Fig. S14). Moreover, we  
250 identified 19,976 non-domestic SVs in the MA and 15,588 non-domestic SVs in the SB,

251 which were not present in domestic ducks (including Pekin and IND). These SVs might  
252 serve as valuable resources for increasing genetic diversity and/or improving the  
253 economic traits of domestic ducks through hybridization.

254 We further identified divergent SVs between populations by calculating  $F_{ST}$  values  
255 for five comparison pairs: domestic-MA, Pekin-MA, IND-MA, Pekin-IND, and Pekin-  
256 IND & MA. Each pair yielded 32-171 SVs with  $F_{ST}$  values greater than 0.5 (Fig. 5B), and  
257 most genes near these SVs showed significant differential expression between domestic  
258 and wild ducks (*SI*, Table S10 and *SI Appendix*, Fig. S15). Among SVs with top 10  $F_{ST}$   
259 values in each pair, one domestic-MA divergent SV was located at ~80 kb upstream of  
260 the *GHR* (Growth Hormone Receptor) gene, a critical gene for body growth (27).  
261 Another domestic-MA divergent SV was in ~30 kb upstream of the *FER* gene, which is  
262 associated with the retinal development (28). Two Pekin-specific SVs were identified in  
263 proximity to genes associated with feather color (*MITF*) (13) and chondrogenesis  
264 (*ADAMST12*) (29), respectively (Fig. 5 C and D and *SI Appendix*, Fig. S16 and S17). The  
265 *GHR*, *FER*, and *ADAMST12* genes showed significant differential expression between  
266 domestic and wild ducks (*SI Appendix*, Fig. S15 and S16), and the Dual-Luciferase  
267 Reporter assays showed that DF-1 cells (chicken fibroblast cell) expressing SV allele of  
268 Pekin duck had significantly higher or lower luciferase activity compared to DF-1 cells  
269 expressing SV allele of MA (Fig. 5E). These observations suggested that these  
270 differential SVs might have played an important role in the domestication of ducks by  
271 altering gene expression.

272 **Potential effect of LTR-RT burst on duck domestication.** LTR-RT (long terminal  
273 repeat retrotransposons), an important source of SV, affects the host genome in many  
274 ways, such as regulating gene expression (30). Here, we observed two LTR-RT bursts  
275 occurred during the evolution of *Anas* species. The recent burst (~122 kya) occurred in  
276 domestic ducks and their closely related species (Pekin, SX, MA, and SB), and the  
277 ancient burst (~924 kya) occurred in other five distantly related species of domestic duck  
278 (Fig. 6A). Detailed analysis showed that each *Anas* genome had a specific set of intact  
279 LTR-RTs (intact-LTRs), ranging from 159 to 665, and the Pekin duck specifically shared  
280 51 intact-LTRs (the domestic intact-LTRs) with SX, indicating that the recent LTR-RT  
281 burst was sustained during duck domestication (Fig. 6B, *SI Appendix*, Table S11). The  
282 divergence times of specific intact-LTRs were significantly shorter than those of non-  
283 specific intact-LTRs in each genome, consistent with the fact that specific LTRs appeared  
284 later (Fig. 6C). A phylogenetic tree of LTR sequences revealed six clades contained large  
285 number of expanded LTR-RTs and had short inner branch lengths. This was consistent to  
286 appearance of the recent burst peak of LTR-RTs (Fig. 6 D and E), implying that these  
287 clades might represent the recent burst event. Moreover, we characterized flanking  
288 sequences of intact-LTRs from Pekin ducks in four duck populations (Pekin, IND, MA,  
289 and SB). This found that these regions had an extremely low density of SNPs. Among  
290 them, the flanking regions of domestic intact-LTRs exhibited significantly higher  $F_{ST}$   
291 values between MA and domestic ducks (Fig. 6 F and G and *SI Appendix*, Fig. S18).

292 Next, we investigated effect of LTR bursts on gene function. It found that more than  
293 53.1% of the intact-LTRs were in genes or the 0-10kb gene flanking regions (Fig. 6H). In  
294 Pekin duck genome, 208 Pekin-specific intact-LTRs were close to 153 genes and 51

295 domestic intact-LTRs were close to 31 genes (*SI*, Table S12). Among these genes, 67.9%  
296 (125/184) showed differential expression between domestic and wild ducks (*SI Appendix*,  
297 Fig. S19A). We then manually selected four Pekin-specific intact-LTRs and seven  
298 domestic intact-LTRs for further analysis. One Pekin-specific intact-LTR resulted in the  
299 Pekin-specific SV were in the intron of the *MITF*. While another resulted in an SV  
300 located in the 13.1 kb upstream of the gastric inhibitory polypeptide (*LOC101796187*)  
301 gene, which might stimulate insulin secretion (31), and in the 1.7 kb upstream of the  
302 well-known body-weight related gene (*IGF2BP1*) (13, 32) (*SI Appendix*, Fig. S19B and  
303 S20). Further analysis indicated that this SV could significantly increase the luciferase  
304 activity in DF-1 cells (Fig. 5E). It was consistent to that Pekin ducks had a higher  
305 expression of *IGF2BP1* than MAs (Fig. 6I and *SI Appendix*, Fig. S19C), supporting that  
306 this SV might be a causative variant for body weight. The remaining two Pekin-specific  
307 intact-LTRs were close to genes involved in egg production (*ANXA5*) (33) and muscle  
308 development (*QKI*) (34), respectively. Seven domestic-specific intact-LTRs were close to  
309 genes associated with muscle development (*SLC24A3*), adipogenesis (*RSPO2*), and the  
310 hearing system (*PCDH15*) (35–37). In summary, these findings highlighted important  
311 roles of LTR-RTs in the evolutionary trajectory and domestication of ducks, through  
312 generating SVs and regulating gene expression. It might, in return, enhance ducks’  
313 adaptability to domestic environments.

314

315

## 316 **Discussion**

317

318 The evolutionary process is quite complicated, affecting by multiple factors such as gene  
319 flow, selection and ILS (38). Here, we generated eight high-quality *Anas* genomes using

320 advanced sequencing technologies, and revealed the extensive phylogenetic  
321 inconsistencies in *Anas* species, specifically highlighting phylogenetic conflicts between  
322 autosomes and Z chromosome (Fig. 3C and Fig. 4A). By comparing the evolutionary  
323 characteristics (i.e. phylogeny, ancestral components) of the Z chromosome to those of  
324 autosomes, we inferred the hybrid speciation of ACR, where the hybrid speciation is  
325 increasingly recognized as a creative evolutionary force contributing to species  
326 adaptation and speciation (39). We also proposed that the MA-SB speciation was a  
327 sympatric speciation accompanied by sexual selection-mediated female-biased gene flow  
328 (*SI Note 1*). The phylogenetic inconsistencies between the autosomes and the Z  
329 chromosome might be partially attributed to the Z chromosome's resistance to  
330 introgression (Fig. 4C). This suggested that, for species with frequent cross-species  
331 hybridization, such as birds (40), the Z chromosome with less introgression was more  
332 suitable for elucidating phylogenetic relationships and the processes of domestication  
333 than the autosomes. Recent avian phylogeny were estimated based on resequencing data  
334 or genomes with relatively low-quality and/or lack of the Z chromosome sequence (41,  
335 42). Such analysis might lead to biased or controversial avian phylogeny (43). The future  
336 ability to generate high-quality avian genomes including the Z chromosome sequence and  
337 to compare the evolutionary history of the autosomes and Z chromosome will certainly  
338 extend our knowledge of avian evolution.

339         Spatiotemporal patterns of domestication, domestication genes and factors behind  
340 a few wild species being domesticated are three key questions in the area of  
341 domestication studies (1, 44). In this study, we have performed meaningful exploration to  
342 partially answer these three questions in *Anas* species. Firstly, we found that multiple



343 gene flows, particular the introgression from SB to domestic duck, were occurred in duck  
344 domestication, and further remodeled a clearer duck domestication history when  
345 compared to previous studies (12). We obtained the best-estimated model (model A, with  
346 lowest AIC values) of duck domestication, assuming that ancestor of domestic ducks  
347 diverged from their descended MA ~19 kya. This was consistent with the identified  
348 bottleneck event (*SI Appendix*, Fig. S21). However, it is important to acknowledge that  
349 the possibility of alternative scenarios (model B, J and K) cannot be entirely excluded (*SI*  
350 *Appendix*, Fig. S12 *B* and *C*). More evidence, especially fossil records, is required to  
351 confirm the inferred timeline of duck domestication. Secondly, we identified several SVs  
352 that appeared in nearly all domestic ducks but were rarely observed in wild ducks. Two  
353 of these SVs showed regulatory effects on their downstream genes in vitro. These  
354 observations together with neighbor genes (*GHR*, *FER*) of these two SVs showed  
355 significantly differential expression between domestic and wild ducks, suggests that these  
356 regions might have been under strongly selected and contributed to phenotypic changes  
357 (such as body growth) in domestic ducks. Thirdly, our study highlighted an LTR-RT  
358 burst in the wild ancestors of domestic ducks, and the evolutionary signatures, such as  
359 SNP density, around intact-LTR regions. Previous studies have shown that LTR-RT burst  
360 was related to the environment adaption in birds (45), and here we found that LTR-RT  
361 burst might be involved in duck domestication. For example, some Pekin or domestic  
362 specific intact-LTRs potentially regulate the expression of their neighbor genes  
363 associated with animal domestication, including *IGF2BP1* for increasing body size (13),  
364 *MITF* for feather color changing (13), *PCDH15* for adapting environment (35) and  
365 *ANXA5* for enhancing productive ability (33). These insights might help to explain why

366 MA, compared to other wild duck species, has been successfully domesticated by  
367 humans. Of course, further experimental evidence is required to unravel how these intact-  
368 LTRs regulated “domestication genes” and contributed to duck domestication.

369 Of special interest to agriculture and medicine is the fact that ducks hold  
370 significant importance as a domestic animal and one of the principal natural reservoirs for  
371 influenza A viruses. In this study, we detected large number of cross-species genetic  
372 variants (2.95-12.79 million SNPs, 0.41-1.57 million INDELs and 0.23 million SVs) in  
373 *Anas* using our eight high-quality genomes, together with our recently available Pekin  
374 duck genome. Among them, 135,311 SVs observed in wild ducks were overlapped with  
375 11,748 genes. In particular, these SVs overlapped with the CDS region of 317 genes,  
376 enriched in carbohydrate metabolism, regulation of anatomical structure size et al (*SI*  
377 *Appendix*, Fig. S22). Since domestic ducks might extensively hybridize with wild ducks  
378 (<http://www.bird-hybrids.com/>), such substantial genetic variants of wild ducks might be  
379 used to increase genetic diversity of domestic ducks. It would in return magnify  
380 phenotype variation and accelerate duck breeding. Moreover, our eight chromosome-  
381 level *Anas* genomes, together with their reference gene sets, provide resources for fine  
382 charactering interaction between host and influenza viruses.

383

384

## 385 **Materials and Methods**

386

387 **Sample collection and data generation.** One female domestic duck (SX) for genomic  
388 sequencing was collected from Zhejiang Guowei duck farm, Zhejiang, China. Seven  
389 female wild ducks for genomic sequencing were collected from two duck farms with

390 available hunting licenses: Zhejiang Aoji Duck farm in Zhejiang, China; Longyao farm  
391 for special economic animals in Shandong, China.

392 Genomic DNA was isolated from fresh blood and RNA were isolated from four or  
393 five tissues of eight ducks. Normal ONT (Oxford Nanopore Technologies) long reads for  
394 six samples, ONT ultralong reads and full-length transcripts for all eight ducks were  
395 generated using the Nanopore PromethION sequencer and HiFi reads for two samples  
396 (MA and SB) were generated using the PacBio Sequel II sequencer (*SI Appendix*, Table  
397 S1). Optical molecules of high-quality genomic DNA (labeled restriction enzyme DLE1)  
398 were produced using the BioNano Genomics (BNG) instrument Saphyr. Short paired-end  
399 reads of the genomic DNA and the Hi-C libraries for eight duck samples were sequenced  
400 using the Illumina NovaSeq 6000 or MGISEQ-2000 platform (*SI Appendix*, Table S1).  
401 All library preparations and sequencing were conducted at the Genome Center of  
402 GrandOmics Bioscience Co., Ltd. (Wuhan, China). The ONT reads with quality scores  $\geq$   
403 7 were utilized for subsequent analyses, and the HiFi reads were extracted from the bam  
404 files using the ccs (v3.4.1, <https://github.com/PacificBiosciences/ccs>) software with  
405 default parameters. Unless otherwise stated, all NGS DNA and RNA data used in  
406 subsequent analyses underwent quality control by fastp (v0.20.0) with default parameters  
407 (46).

408 **Genome assembly and annotation.** Briefly, six ducks (SX, AAC, ACR, AFA, ACL, and  
409 AFO) without HiFi data were assembled and polished by using Nextdenovo (v.2.2) and  
410 NextPolish (v1.1.0) (47). The contigs were hybrid assembled with BioNano maps using  
411 the BioNano Solve (v3.3) (<https://bionano.com/software-downloads/>). Scaffolds were  
412 then assigned to chromosomes using Hi-C-based proximity-guided assembly, followed by

413 manual adjustment using juicerbox (v1.11.08) (48) and 3d-dna (v180922) (49) software.  
414 After that, gaps in the assembly were filled using TGS-Gapcloser (v1.1.1) (50). For two  
415 duck species (MA and SB) with HiFi data, their assembly was performed using Hifiasm  
416 (v0.16.0) (51), while the other steps are same to above six ducks (*SI Appendix*, Fig. S2A).

417 For genome annotation, we identified transposable elements using the EDTA  
418 (v.1.9.6) (52) and annotate repeat sequences using the RepeatMasker (v4.1.0)  
419 (<https://www.repeatmasker.org/- RepeatMasker/>). We then integrated information of  
420 homology prediction, de novo prediction and RNA sequences to predict protein-coding  
421 genes. In brief, RNA evidence from three sources was preprocessed. Protein sequences of  
422 human (GRCh38), mouse (GRCm39), chicken (GRCh6a) and duck (ZJU1.0) downloaded  
423 from the NCBI database, together with our recently Pekin duck reference protein, were  
424 used as homology evidence. The RNA-derived gtf files and homologous protein  
425 sequences were then input into the MAKER (v3.01.03) (53) pipeline to obtain the  
426 annotation of protein-coding genes. On the other hand, transcript models were extracted  
427 directly from long-read transcripts, and the Pekin duck reference gene set (SKLA2.0)  
428 were lift to our assemblies using the official command of Liftoff (v1.6.1) (54). Finally,  
429 the gtf files generated by MAKER, Liftoff, long-read transcripts, and repeat annotation  
430 were combined using in-house scripts (*SI Appendix*, Fig. S2B).

431 Detailed descriptions of genome assembly and annotation were provided in *SI Note*

432 **2.**

433 **Evaluation of assembly and annotation.** The quality of the genome assembly and  
434 annotation were assessed as the following: Firstly, eight *de novo* assemblies, together  
435 with Pekin duck (SKLA2.0) genome and chicken (GRCg7b) genome, were blast against

436 the aves\_odb10 dataset containing 8,338 conserved protein models, using BUSCO  
437 (v4.0.6) program in genome mode, with default settings. Secondly, eight ducks' NGS data  
438 were mapped to their assemblies to identify variants using the HaplotypeCaller module of  
439 GATK (v4.1.8.0) (55). After quality control (see variants calling part), the homozygous  
440 variants were extracted and used to calculate quality value (QV) of genome assemblies.  
441 Thirdly, predicted proteins of the above assemblies were blast against the aves\_odb10  
442 dataset in protein mode to evaluate annotation quality. Finally, the predicted proteins of  
443 the above eight assemblies (Query) were compared to the proteins of the GRCg7b and  
444 SKLA2.0 annotations (Target) using BLASTP (2.9.0+) (56).

445 **Comparative genomic analysis.** The guide species tree of nine *Anas* and sixteen non-  
446 *Anas* species (SI, Table S7) was generated by OrthoFinder (v2.5.1) (58), and then the  
447 whole-genome alignments (WGA) were performed using the Cactus (v1.2.0) (57) with  
448 the soft-masked genomes. The resulting hal file was converted to the maf files using  
449 hal2maf(59) program (--onlyOrthologs --noAncestor --nodupes --refGenome SKLA2.0),  
450 and subsequently filtered using mafFilter program ([https://anaconda.org/bioconda/ucsc-](https://anaconda.org/bioconda/ucsc-maffilter)  
451 [maffilter](https://anaconda.org/bioconda/ucsc-maffilter)) with the -minCol=100 option. After that, the 4d-site msa (multi-sequence  
452 alignments) files were obtained from the filtered maf files according to Chen et al (60),  
453 and removed gaps using Gblock (61). Autosome and/or Z chromosome 4d-site msa files  
454 were used to construct phylogenetic trees with RAxML-ng (v1.0.1) (62) (--model  
455 GTR+G --threads 100 --all --bs-trees 1000).

456 Genomes were sequentially aligned to each other using minimap2 (version 2.17-  
457 r941)(63) with parameters: -ax asm5 -eqx. The genomic synteny and structural  
458 rearrangements were then identified using SyRI (v1.6) (64) and visualized using plotsr

459 (65). For gene synteny, the longest transcripts of all species were aligned using BLASTP  
460 with parameters of e-value  $< 1e^{-10}$ , -max\_target\_seqs 1. Synteny analysis was then  
461 performed using the MCScanX (66) package with default settings, and gene synteny was  
462 generated using an online website (<https://synvisio.github.io/>) (67).

463 HCEs analysis was carried out similar as previous study (60). In our analysis,  
464 sixteen non-*Anas* species were used as outgroups to identify the conserved elements of  
465 *Anas*, and sixteen non-*Anas* species together with seven wild duck species were used as  
466 outgroups to determine the conserved elements of domestic ducks (Pekin and SX).

467 **Divergence time calibration.** Species divergence times were calibrated using  
468 MCMCTREE in PAML (Version 4.9d) (68). Five external calibration times from Prum  
469 (41) were added to the autosome 4d-site tree. The MCMCTREE run involved increasing  
470 the burn-in steps and sampling step size until convergence was achieved, indicated by an  
471 Effective Sample Size (ESS) greater than 200. Finally, the posterior distribution of  
472 divergence times based on 50000 samples was obtained by MCMC (Markov chain Monte  
473 Carlo) sampling, setting the burn-in steps to  $2 \times 10^7$  and sampling every 1,000 steps.

474 **Demographic history inferences and remodeling.** To infer the *Anas* demographic  
475 history, a PSMC (69) analysis was performed according to official guidelines. A  
476 generation time (g) of one year and a mutation rate per generation of  $\mu=1.91 \times 10^{-9}$  were  
477 used (70) to draw the demographic history using `psmc_plot.pl` script. To infer the recent  
478 demographic history of Pekin, IND, MA, and SB, ten individuals (five males and five  
479 females) with less introgression was selected from the population VCF file, according to  
480 the admixture results. To avoid the influence of ancient historical events on the inference  
481 of recent demographics, variants detected in the other five wild ducks were filtered out

482 using VCFtools (<http://vcftools.sourceforge.net>). SMC++ ( v1.15.2) (71) analysis was  
483 conducted for autosomes according to official procedures with the same generation time  
484 and mutation rate as the PSMC analysis.

485 To remodel duck domestication history, different domestication models were tested  
486 using fastsimcoal2 (72). First, the VCF file for SMC++ analysis was converted to a site  
487 frequency spectrum (SFS) file using EasySFS (<https://github.com/isaacovercast/easySFS>).  
488 After that, models with the following parameters: -n 100000 -M -c12 -q -multiSFS were  
489 evaluated under 100 run times using fastsimcoal2, and the model with the lowest Akaike  
490 information criterion (AIC) value was selected as the preferred model. Strategies and  
491 codes for domestication model analyses were referred an online website  
492 (<https://speciationgenomics.github.io/>).

493 **Introgression and incomplete lineage sorting analyses.** For introgression analysis, the  
494 MAF files were transformed into Variant Call Format (.vcf) by mafFilter, and  
495 subsequently files were converted into a geno file using vcf2eigenstrat.py script from  
496 gdc-master (<https://github.com/mathii-/gdc>). D-statistics (so called ‘ABBA-BABA’ test)  
497 for different species combinations were carried out using qpDstat module from  
498 Admixtools (v7.0.2) (73), and topology weighting analysis was conducted with reference  
499 to the online manual ([https://github.com/simonhmartin/genomics\\_general](https://github.com/simonhmartin/genomics_general)).

500 For ILS analysis and gene tree analyses, WGAs files were split into sliding windows  
501 using msa\_split from PHAST (v1.4) (74). Small windows (10 kb, 1 kb) with gap  
502 ratios >10% were filtered out. The coalescent analysis were performed in accordance  
503 with Feng's study (38). Briefly, 1,066 (1 Mb), 2,060 (500 kb), 7,298 (100 kb), 61,902  
504 (10kb), and 584,729 (1 kb) qualified autosomal window trees, and 86 (1 Mb), 171 (500

505 kb), 505 (100 kb), 4,970 (10 kb), and 50,144 (1 kb) qualified Z chromosome window  
506 trees were input into ASTRAL-III (v5.6.2) (75) to obtain the coalescence species tree.  
507 The phylogenetic discordance was calculated with DiscoVista (v1.0) (76) in different  
508 window sizes, taking the 4d-site tree as the reference tree.

509 **Variants calling.** For individuals with genome assemblies, SNPs and INDELs were  
510 extracted from the VCF file, which were generated in genome assessment (referred as  
511 NGS-SNP and NGS-INDEL). Insertions (Cactus-INS), deletions (Cactus-DEL), and SNP  
512 (Cactus-SNP) from WGs for each species were extracted using halBranchMutations (59)  
513 program from the cactus toolkit. Long reads of genome assembled individuals were  
514 aligned to their corresponding assemblies using minimap2, and structural variants (TGS-  
515 SV) were identified using SVIM (v1.4.2) (77) with default parameters and filtered  
516 according to the recommendations of the authors. Variants were annotated using  
517 ANNOVAR (78) and visualized using maftools (R package, version 2.4.12) (79).

518 Population-SNP and population-INDEL were detected with clean reads of 174  
519 available samples (13, 80–82) and 26 samples sequenced in our study (SI, Table S13) by  
520 aligning to the reference genome (SKLA2.0 and the W chromosome from ZJU1.0) using  
521 BWA (0.7.17-r1188) (83) with default parameters. Joint SNP calling for 180 out of the  
522 200 samples was performed following GATK best practices workflow suggested on the  
523 official website. SNPs were filtered with “QualByDepth (QD) < 2.0, mapping quality  
524 (MQ) < 40.0, Fisher Strand (FS) > 60.0, StrandOddsRatio (SOR) > 3.0, MQRankSum < -  
525 12.5, ReadPosRankSum < -8.0”, and INDELs were filtered with “QD < 2.0, FS > 200.0,  
526 SOR > 10.0, MQRankSum < -12.5, ReadPosRankSum < -8.0”. While the SNP calling for  
527 additional 20 public MA samples from Zhang et al (80) was conducted by the GATK



528 HaploTypeCaller module based on the variant sites from the joint calling, and with an  
529 additional filter to remove variants in regions with a mean depth of less than 5×.

530 **Distribution analysis of repeats and variants.** The nine *Anas* genomes were divided  
531 into gene (UTR not included), CDS, intron, and gene flanking regions (0-10 kb, 10-20 kb,  
532 20-30 kb, 30-40 kb, 40-50 kb, and >50 kb). Various genomic features (all-repeats, all-  
533 LTR, intact-LTR, HCE, NGS-SNP, NGS-INDEL, TGS-SV, Cactus-SNP, Cactus-INS,  
534 Cactus-DEL, population-SNP, and population-INDEL) were considered. The relative  
535 distance from genomic features to the gene and the distribution of genomic features were  
536 obtained using bedtools (v2.30.0) (84). Paired sample t-tests were conducted to determine  
537 whether genomic feature in specific region was disproportionately compared to the null  
538 distribution (percentages of different genome regions in the genome). A chi-square test  
539 was performed on 2 × 2 contingency tables to analyze the distributions of HCE features.  
540 The gene enrichment analysis was performed on the online website  
541 (<https://metascape.org/>).

542 **Population structure analysis.** Autosomal and Z-linked SNPs were filtered by  
543 PLINK2.0 (85) (--maf 0.01 --geno 0.2 --indep-pairwise 50 5 0.5). The sex of samples  
544 were determined using the 'plink --sex-check' command, females' heterozygous sites and  
545 the 0-2 Mb region (containing the pseudo-autosome) on Z chromosome were removed.  
546 Distance metrics between individuals were obtained using the 'plink --distance square 1-  
547 ibs flat-missing' command, and subsequently used to construct autosomal and Z  
548 chromosome phylogenetic trees with the phylip (v3.697) neighbor program. Phylogenetic  
549 trees were visualized on an online website (<https://itol.embl.de/>). Using the same dataset,  
550 autosome and Z chromosome admixture were quantified among all samples using

551 ADMIXTURE (v1.3) (86) for possible group numbers from 2 to 7, and the --  
552 haploid="male:X" parameter was added in the run for Z chromosome.

553 **Long-terminal repeats retrotransposon analysis.** Intact-LTRs on chromosomes were  
554 collected from the above EDTA results. The divergence of two-sided LTR sequences for  
555 intact-LTRs was converted to the insertion time of intact-LTR using formula:  
556  $Divergence / (1.91 \times 10^{-9} \times 2)$ . Shared Intact-LTRs were identified by aligning Intact-  
557 LTRs to target genomes with thresholds of length > 11 kb and identity > 0.95. Specific  
558 LTR-RTs referred to LTR-RTs that existed only in one genome; specific shared LTR-RTs  
559 meant LTR-RTs shared by an exact number of genomes.

560 LTR sequences of intact-LTRs (*Gypsy*-type) were aligned using MAFFT (v7.475)  
561 (87) with default parameters. Phylogenetic tree of LTR sequences was generated using  
562 iqtree2 (v2.1.2) (88) with the K80 model. Permutation was performed by shuffling the  
563 genome blocks of different types of intact-LTR and calculating the SNP density or  $F_{ST}$   
564 values 1,000 times. Welch's two-sample t-test was conducted using R to compare the  
565 divergences or signatures of different intact-LTRs.

566 **Pan-genome construction and evaluation.** An SV-based graph pan-genome was  
567 constructed by running minigraph (version 0.18-r538) to integrate eight new genomes  
568 and the SKLA2.0 Pekin genome. The graph in GFA format was converted to graph  
569 indexes using the vg (v1.43.0) autoindex command. The source of the nodes in the pan-  
570 genome was identified by referring to previous studies (89).

571 For pan-genome evaluation, long reads from the above nine ducks were aligned to  
572 the graph genome using the giraffe module of the vg program with the -align-from-chains  
573 option. The aligned gaf file was subjected for quality control, and the mapping rate was

574 calculated using the R script from Liao et al (90). NGS reads of these nine ducks were  
575 aligned to the pan-genome to detect SVs using the giraffe, pack, and call modules of the  
576 vg program. The ‘PASS’ SVs from these nine ducks were merged into one SV dataset  
577 (test SV set) using BCFtools (v1.15.1) (91). On the other hand, eight duck assemblies  
578 were aligned to the reference (SKLA2.0) with minimap2, and SVs were identified using  
579 paf tools (2.24-r1122). SVs with a length  $\geq 50$  bp were merged using jasmine (v1.1.4) (92)  
580 to obtain a SV dataset (base SV set), and further compared to the test SV set using  
581 Truvari (v3.5.0) (93) under defaults.

582 **SV divergence analysis.** All SVs of the 200 samples were identified using the same  
583 methods as the above nine individuals with NGS data. SV  $F_{ST}$  was calculated for five  
584 comparison pairs (Pekin vs. IND, Pekin vs. MA, IND vs. MA, Pekin & IND vs. MA,  
585 Pekin & IND vs. MA & SB) using the following formula:

$$F_{ST} = \frac{H_T - H_S}{H_T}$$

586 Where:

$$H_T = 2 * \left( \frac{A_1 + A_2}{2 * P_1 + 2 * P_2} \right) * \left( 1 - \left( \frac{A_1 + A_2}{2 * P_1 + 2 * P_2} \right) \right)$$
$$H_S = \frac{2 * F_1 * (1 - F_1) * 2 * P_1 + 2 * F_2 * (1 - F_2) * 2 * P_2}{2 * P_1 + 2 * P_2}$$

587  $H_T$  and  $H_S$  are the heterozygosity of the total population and the average heterozygosity  
588 of subpopulations expected under Hardy–Weinberg equilibrium;  $A_1$ ,  $A_2$  are the number of  
589 SV frequencies in population1, population2; and  $P_1$ ,  $P_2$  are the size of the population1,  
590 population2;  $F_1$ ,  $F_2$  are the SV frequency in population1, population2.

591 **Luciferase reporter assays on highly divergent SVs.** Four SVs were tested by PCR  
592 amplification using genomic DNA (*SI Appendix, Fig. S23* and *SI Appendix, Table S14*),  
593 and their purified PCR products used to construct six pGL3-Pekin-SV vectors, six pGL3-  
594 MA-control vectors, and one pGL3-basic control vector. The dual-luciferase activity of  
595 vectors was evaluated in DF-1 cells. In brief, vectors were transfected into DF-1 cells  
596 with jetPRIME (Polyplus), and dual-luciferase activity was measured using the Dual-Glo  
597 Luciferase Assay kit (Promega) after a 48-h incubation with three biological replicates.  
598 Differences in fluorescence intensity between vectors in DF-1 cells were compared using  
599 the two-sided t-test.

600 **RNA-seq analysis.** Available clean RNA-Seq reads of 185 samples (11, 80, 94) (*SI*,  
601 *Table S15*) were aligned to the SKLA2.0 Pekin duck genome using HISAT2. Number of  
602 mapped reads was calculated using featureCounts (version 2.0.3) software (95) and  
603 subsequently used to count FPKM values using the Python bioinfokit (v0.9.1) package.

604 Fifteen pairs of RNA-seq data were used to identify different expressional genes in  
605 MA and Pekin (or domestic) (*SI Appendix, Table S16*). Samples with low correlation ( $R^2$   
606  $< 0.95$ ) compared to other samples were excluded as invalid biological replicates. The  
607 fold-change and adjusted  $p$  value of each gene was calculated using DESeq2 (v.1.24.0)  
608 software. Gene expression was visualized using FPKM values normalized with the  
609 maximum FPKM value of each gene in fifteen RNA data.

610

611

## 612 **Acknowledgments**

613

614 We thank Prof. Lusheng Huang (Jiangxi Agricultural University), Prof. Wen Wang  
615 (Northwestern Polytechnical University), Prof. Yu Jiang (Northwest A&F University)

616 and Prof. Guojie Zhang (Zhejiang University) for discussion and comments about avian  
617 evolutionary analysis. We acknowledge Xuetao Huang (Zhejiang Guowei duck farm),  
618 Huabin Cao (Jiangxi Agricultural University), Puyan Meng (Wildlife Rescue and  
619 Breeding Center of Jiangxi Province) for sample collections. The sequencing of the duck  
620 genomes was funded by the National Waterfowl-Industry Technology Research System  
621 (CARS-42) and the National Science Foundation of China (32172716). This work was  
622 supported by China Agriculture Research System (No. CARS-35) and the National Key  
623 Research and Development Program of China (2022YFF1000100).

624

625

## 626 **References**

627

- 628 1. L. Andersson, M. Purugganan, Molecular genetic variation of animals and plants  
629 under domestication. *Proc. Natl. Acad. Sci. U.S.A.* **119**, e2122150119 (2022).
- 630 2. B. T. Moyers, P. L. Morrell, J. K. McKay, Genetic Costs of Domestication and  
631 Improvement. *Journal of Heredity* **109**, 103–116 (2018).
- 632 3. F. Biscarini, E. L. Nicolazzi, A. Stella, P. J. Boettcher, G. Gandini, Challenges  
633 and opportunities in genetic improvement of local livestock breeds. *Front Genet*  
634 **6**, 33 (2015).
- 635 4. S. Swarup, *et al.*, Genetic diversity is indispensable for plant breeding to improve  
636 crops. *Crop Science* **61**, 839–852 (2021).
- 637 5. D. Tang, *et al.*, Genome evolution and diversity of wild and cultivated potatoes.  
638 *Nature* **606**, 535–541 (2022).
- 639 6. L. Chen, *et al.*, Genome sequencing reveals evidence of adaptive variation in the  
640 genus *Zea*. *Nat Genet* (2022) <https://doi.org/10.1038/s41588-022-01184-y>  
641 (October 28, 2022).
- 642 7. L. Shang, A super pan-genomic landscape of rice. *Cell Research*, 19 (2022).
- 643 8. T. E. Dowling, C. L. Secor, The Role of Hybridization and Introgression in the  
644 Diversification of Animals. *Annu. Rev. Ecol. Syst.* **28**, 593–619 (1997).
- 645 9. K. H. Redford, N. Dudley, Why should we save the wild relatives of domesticated  
646 animals? *Oryx* **52**, 397–398 (2018).
- 647 10. W. J. Bock, J. Farrand, The Number of Species and Genera of Recent Birds: A  
648 Contribution to Comparative Systematics'. 36 (1980).
- 649 11. F. Zhu, *et al.*, Three chromosome-level duck genome assemblies provide insights  
650 into genomic variation during domestication. *Nat Commun* **12**, 5932 (2021).
- 651 12. X. Guo, *et al.*, Revisiting the evolutionary history of domestic and wild ducks  
652 based on genomic analyses. *Zoological Research* **42**, 43–50 (2021).

- 653 13. Z. Zhou, *et al.*, An intercross population study reveals genes associated with body  
654 size and plumage color in ducks. *Nat Commun* **9**, 2648 (2018).
- 655 14. J. Diamond, Evolution, consequences and future of plant and animal  
656 domestication. *Nature* **418**, 700–707 (2002).
- 657 15. Y. Hou, *et al.*, Genome-wide analysis reveals molecular convergence underlying  
658 domestication in 7 bird and mammals. *BMC Genomics* **21**, 204 (2020).
- 659 16. P. Nosil, J. L. Feder, Z. Gompert, How many genetic changes create new species?  
660 *Science* **371**, 777–779 (2021).
- 661 17. N. B. Edelman, *et al.*, Genomic architecture and introgression shape a butterfly  
662 radiation. *Science*, 7 (2019).
- 663 18. D. Brawand, *et al.*, The genomic substrate for adaptive radiation in African  
664 cichlid fish. *Nature* **513**, 375–381 (2014).
- 665 19. R. Barrett, D. Schluter, Adaptation from standing genetic variation. *Trends in*  
666 *Ecology & Evolution* **23**, 38–44 (2008).
- 667 20. B. Charlesworth, J. A. Coyne, N. H. Barton, The Relative Rates of Evolution of  
668 Sex Chromosomes and Autosomes. *The American Naturalist* **130**, 113–146  
669 (1987).
- 670 21. A. Suh, L. Smeds, H. Ellegren, The Dynamics of Incomplete Lineage Sorting  
671 across the Ancient Adaptive Radiation of Neoavian Birds. *PLoS Biol* **13**,  
672 e1002224 (2015).
- 673 22. P. Lavretsky, K. G. McCracken, J. L. Peters, Phylogenetics of a recent radiation  
674 in the mallards and allies (Aves: Anas): Inferences from a genomic transect and  
675 the multispecies coalescent. *Molecular Phylogenetics and Evolution* **70**, 402–411  
676 (2014).
- 677 23. C. A. Smith, *et al.*, The avian Z-linked gene DMRT1 is required for male sex  
678 determination in the chicken. *Nature* **461**, 267–271 (2009).
- 679 24. F. Wang, *et al.*, A Genome-Wide Scan on Individual Typology Angle Found  
680 Variants at SLC24A2 Associated with Skin Color Variation in Chinese  
681 Populations. *Journal of Investigative Dermatology* **142**, 1223-1227.e14 (2022).
- 682 25. D. Li, *et al.*, Breeding history and candidate genes responsible for black skin of  
683 Xichuan black-bone chicken. *BMC Genomics* **21**, 511 (2020).
- 684 26. H. Li, X. Feng, C. Chu, The design and construction of reference pangenome  
685 graphs with minigraph. *Genome Biol* **21**, 265 (2020).
- 686 27. E. O. List, *et al.*, Endocrine Parameters and Phenotypes of the Growth Hormone  
687 Receptor Gene Disrupted (GHR<sup>-/-</sup>) Mouse. *Endocrine Reviews* **32**, 356–386  
688 (2011).
- 689 28. A. W. B. Craig, R. Zirngibl, K. Williams, L.-A. Cole, P. A. Greer, Mice Devoid  
690 of Fer Protein-Tyrosine Kinase Activity Are Viable and Fertile but Display  
691 Reduced Cortactin Phosphorylation. *Mol Cell Biol* **21**, 603–613 (2001).
- 692 29. X. H. Bai, D. W. Wang, Y. Luan, X. P. Yu, C. J. Liu, Regulation of chondrocyte  
693 differentiation by ADAMTS-12 metalloproteinase depends on its enzymatic  
694 activity. *Cell. Mol. Life Sci.* **66**, 667–680 (2009).
- 695 30. G. Bourque, *et al.*, Ten things you should know about transposable elements.  
696 *Genome Biol* **19**, 199 (2018).

- 697 31. R. A. Pederson, C. H. McIntosh, Discovery of gastric inhibitory polypeptide and  
698 its subsequent fate: Personal reflections. *J Diabetes Investig* **7**, 4–7 (2016).
- 699 32. K. Wang, *et al.*, The Chicken Pan-Genome Reveals Gene Content Variation and a  
700 Promoter Region Deletion in *IGF2BP1* Affecting Body Size. *Molecular Biology*  
701 *and Evolution* **38**, 5066–5081 (2021).
- 702 33. D. Wang, *et al.*, Integrative analysis of hypothalamic transcriptome and genetic  
703 association study reveals key genes involved in the regulation of egg production  
704 in indigenous chickens. *Journal of Integrative Agriculture* **21**, 1457–1474 (2022).
- 705 34. X. Chen, *et al.*, The Emerging Roles of the RNA Binding Protein QKI in  
706 Cardiovascular Development and Function. *Front. Cell Dev. Biol.* **9**, 668659  
707 (2021).
- 708 35. L. Liu, *et al.*, Template-independent genome editing in the *Pcdh15* mouse, a  
709 model of human DFNB23 nonsyndromic deafness. *Cell Reports* **40**, 111061  
710 (2022).
- 711 36. A. Georges, *et al.*, Genetic investigation of fibromuscular dysplasia identifies risk  
712 loci and shared genetics with common cardiovascular diseases. *Nat Commun* **12**,  
713 6031 (2021).
- 714 37. H. Dong, *et al.*, Identification of a regulatory pathway inhibiting adipogenesis via  
715 *RSPO2*. *Nat Metab* **4**, 90–105 (2022).
- 716 38. S. Feng, *et al.*, Incomplete lineage sorting and phenotypic evolution in marsupials.  
717 *Cell* **185**, 1646–1660.e18 (2022).
- 718 39. J. Ottenburghs, Exploring the hybrid speciation continuum in birds. *Ecol Evol* **8**,  
719 13027–13034 (2018).
- 720 40. J. Ottenburghs, R. C. Ydenberg, P. Van Hooft, S. E. Van Wieren, H. H. T. Prins,  
721 The Avian Hybrids Project: gathering the scientific literature on avian  
722 hybridization. *Ibis* **157**, 892–894 (2015).
- 723 41. R. O. Prum, *et al.*, A comprehensive phylogeny of birds (Aves) using targeted  
724 next-generation DNA sequencing. *Nature* **526**, 569–573 (2015).
- 725 42. E. D. Jarvis, *et al.*, Whole-genome analyses resolve early branches in the tree of  
726 life of modern birds. *Science* **346**, 1320–1331 (2014).
- 727 43. M. P. Simmons, M. S. Springer, J. Gatesy, Gene-tree misrooting drives conflicts  
728 in phylogenomic coalescent analyses of palaeognath birds. *Molecular*  
729 *Phylogenetics and Evolution* **167**, 107344 (2022).
- 730 44. G. Larson, *et al.*, Current perspectives and the future of domestication studies.  
731 *Proceedings of the National Academy of Sciences* **111**, 6139–6146 (2014).
- 732 45. E. Carotti, *et al.*, LTR Retroelements and Bird Adaptation to Arid Environments.  
733 *IJMS* **24**, 6332 (2023).
- 734 46. S. Chen, Y. Zhou, Y. Chen, J. Gu, fastp: an ultra-fast all-in-one FASTQ  
735 preprocessor. *Bioinformatics* **34**, i884–i890 (2018).
- 736 47. J. Hu, J. Fan, Z. Sun, S. Liu, NextPolish: a fast and efficient genome polishing  
737 tool for long-read assembly. *Bioinformatics* **36**, 2253–2255 (2020).
- 738 48. N. C. Durand, *et al.*, Juicer Provides a One-Click System for Analyzing Loop-  
739 Resolution Hi-C Experiments. *Cell Systems* **3**, 95–98 (2016).
- 740 49. O. Dudchenko, *et al.*, De novo assembly of the *Aedes aegypti* genome using Hi-C  
741 yields chromosome-length scaffolds. *Science* **356**, 92–95 (2017).

- 742 50. M. Xu, *et al.*, TGS-GapCloser: A fast and accurate gap closer for large genomes  
743 with low coverage of error-prone long reads. *GigaScience* **9**, giaa094 (2020).
- 744 51. H. Cheng, *et al.*, Haplotype-resolved assembly of diploid genomes without  
745 parental data. *Nat Biotechnol* **40**, 1332–1335 (2022).
- 746 52. S. Ou, *et al.*, Benchmarking transposable element annotation methods for creation  
747 of a streamlined, comprehensive pipeline. *Genome Biol* **20**, 275 (2019).
- 748 53. M. S. Campbell, C. Holt, B. Moore, M. Yandell, Genome Annotation and  
749 Curation Using MAKER and MAKER-P. *Current Protocols in Bioinformatics*  
750 **48** (2014).
- 751 54. A. Shumate, S. L. Salzberg, Liftoff: accurate mapping of gene annotations.  
752 *Bioinformatics* **37**, 1639–1643 (2021).
- 753 55. A. McKenna, *et al.*, The Genome Analysis Toolkit: A MapReduce framework for  
754 analyzing next-generation DNA sequencing data. *Genome Res.* **20**, 1297–1303  
755 (2010).
- 756 56. C. Camacho, *et al.*, BLAST+: architecture and applications. *BMC Bioinformatics*  
757 **10**, 421 (2009).
- 758 57. J. Armstrong, *et al.*, Progressive Cactus is a multiple-genome aligner for the  
759 thousand-genome era. *Nature* **587**, 246–251 (2020).
- 760 58. D. M. Emms, S. Kelly, OrthoFinder: phylogenetic orthology inference for  
761 comparative genomics. *Genome Biol* **20**, 238 (2019).
- 762 59. G. Hickey, B. Paten, D. Earl, D. Zerbino, D. Haussler, HAL: a hierarchical format  
763 for storing and analyzing multiple genome alignments. *Bioinformatics* **29**, 1341–  
764 1342 (2013).
- 765 60. L. Chen, *et al.*, Large-scale ruminant genome sequencing provides insights into  
766 their evolution and distinct traits. *Science* **364**, eaav6202 (2019).
- 767 61. G. Talavera, J. Castresana, Improvement of Phylogenies after Removing  
768 Divergent and Ambiguously Aligned Blocks from Protein Sequence Alignments.  
769 *Systematic Biology* **56**, 564–577 (2007).
- 770 62. A. M. Kozlov, D. Darriba, T. Flouri, B. Morel, A. Stamatakis, RAxML-NG: A  
771 fast, scalable, and user-friendly tool for maximum likelihood phylogenetic  
772 inference. 5.
- 773 63. H. Li, Minimap2: pairwise alignment for nucleotide sequences. *Bioinformatics*  
774 **34**, 3094–3100 (2018).
- 775 64. M. Goel, H. Sun, W.-B. Jiao, K. Schneeberger, SyRI: finding genomic  
776 rearrangements and local sequence differences from whole-genome assemblies.  
777 *Genome Biol* **20**, 277 (2019).
- 778 65. M. Goel, K. Schneeberger, plotsr: visualizing structural similarities and  
779 rearrangements between multiple genomes. *Bioinformatics* **38**, 2922–2926 (2022).
- 780 66. Y. Wang, *et al.*, MCSanX: a toolkit for detection and evolutionary analysis of  
781 gene synteny and collinearity. *Nucleic Acids Research* **40**, e49–e49 (2012).
- 782 67. V. Bandi, C. Gutwin, Interactive Exploration of Genomic Conservation. 10.
- 783 68. Z. Yang, PAML: a program package for phylogenetic analysis by maximum  
784 likelihood. *Bioinformatics* **13**, 555–556 (1997).
- 785 69. H. Li, R. Durbin, Inference of human population history from individual whole-  
786 genome sequences. *Nature* **475**, 493–496 (2011).



- 787 70. K. Nam, *et al.*, Molecular evolution of genes in avian genomes. *17* (2010).  
788 71. J. Terhorst, J. A. Kamm, Y. S. Song, Robust and scalable inference of population  
789 history from hundreds of unphased whole genomes. *Nat Genet* **49**, 303–309  
790 (2017).  
791 72. L. Excoffier, *et al.*, *fastsimcoal2*: demographic inference under complex  
792 evolutionary scenarios. *Bioinformatics* **37**, 4882–4885 (2021).  
793 73. N. Patterson, *et al.*, Ancient Admixture in Human History. *Genetics* **192**, 1065–  
794 1093 (2012).  
795 74. M. J. Hubisz, K. S. Pollard, A. Siepel, PHAST and RPHAST: phylogenetic  
796 analysis with space/time models. *Briefings in Bioinformatics* **12**, 41–51 (2011).  
797 75. S. Mirarab, *et al.*, ASTRAL: genome-scale coalescent-based species tree  
798 estimation. *Bioinformatics* **30**, i541–i548 (2014).  
799 76. E. Sayyari, DiscoVista\_ Interpretable visualizations of gene tree discordance.  
800 *Molecular Phylogenetics and Evolution*, **6** (2018).  
801 77. D. Heller, M. Vingron, SVIM: structural variant identification using mapped long  
802 reads. *Bioinformatics* **35**, 2907–2915 (2019).  
803 78. K. Wang, M. Li, H. Hakonarson, ANNOVAR: functional annotation of genetic  
804 variants from high-throughput sequencing data. *Nucleic Acids Research* **38**, e164–  
805 e164 (2010).  
806 79. A. Mayakonda, D.-C. Lin, Y. Assenov, C. Plass, H. P. Koeffler, Maftools:  
807 efficient and comprehensive analysis of somatic variants in cancer. *Genome Res.*  
808 **28**, 1747–1756 (2018).  
809 80. Z. Zhang, *et al.*, Whole-genome resequencing reveals signatures of selection and  
810 timing of duck domestication. *GigaScience* **7** (2018).  
811 81. R. Liu, *et al.*, Genomic analyses reveal the origin of domestic ducks and identify  
812 different genetic underpinnings of wild ducks. 2020.02.03.933069 (2020).  
813 82. T. Zhu, *et al.*, Positive selection of skeleton-related genes during duck  
814 domestication revealed by whole genome sequencing. *BMC Ecol Evo* **21**, 165  
815 (2021).  
816 83. H. Li, R. Durbin, Fast and accurate long-read alignment with Burrows–Wheeler  
817 transform. *Bioinformatics* **26**, 589–595 (2010).  
818 84. A. R. Quinlan, I. M. Hall, BEDTools: a flexible suite of utilities for comparing  
819 genomic features. *Bioinformatics* **26**, 841–842 (2010).  
820 85. C. C. Chang, *et al.*, Second-generation PLINK: rising to the challenge of larger  
821 and richer datasets. *GigaSci* **4**, 7 (2015).  
822 86. Fast model-based estimation of ancestry in unrelated individuals (November 24,  
823 2022).  
824 87. K. Katoh, D. M. Standley, MAFFT Multiple Sequence Alignment Software  
825 Version 7: Improvements in Performance and Usability. *Molecular Biology and*  
826 *Evolution* **30**, 772–780 (2013).  
827 88. B. Q. Minh, *et al.*, IQ-TREE 2: New Models and Efficient Methods for  
828 Phylogenetic Inference in the Genomic Era. *Molecular Biology and Evolution* **37**,  
829 1530–1534 (2020).

- 830 89. D. Crysanto, A. S. Leonard, Z.-H. Fang, H. Pausch, Novel functional sequences  
831 uncovered through a bovine multiassembly graph. *Proc. Natl. Acad. Sci. U.S.A.*  
832 **118**, e2101056118 (2021).  
833 90. W.-W. Liao, *et al.*, A draft human pangenome reference. *Nature* **617**, 312–324  
834 (2023).  
835 91. P. Danecek, *et al.*, Twelve years of SAMtools and BCFtools. *GigaScience* **10**,  
836 giab008 (2021).  
837 92. M. Kirsche, *et al.*, “Jasmine: Population-scale structural variant comparison and  
838 analysis” (Genomics, 2021) <https://doi.org/10.1101/2021.05.27.445886> (December  
839 2, 2022).  
840 93. A. C. English, V. K. Menon, R. Gibbs, G. A. Metcalf, F. J. Sedlazeck, “Truvari:  
841 Refined Structural Variant Comparison Preserves Allelic Diversity”  
842 (Bioinformatics, 2022) <https://doi.org/10.1101/2022.02.21.481353> (December 2,  
843 2022).  
844 94. Z. Wang, *et al.*, Dynamics of transcriptome changes during subcutaneous  
845 preadipocyte differentiation in ducks. *BMC Genomics* **20**, 688 (2019).  
846 95. Y. Liao, G. K. Smyth, W. Shi, featureCounts: an efficient general purpose  
847 program for assigning sequence reads to genomic features. *Bioinformatics* **30**,  
848 923–930 (2014).  
849  
850

851 **Figures and Tables**

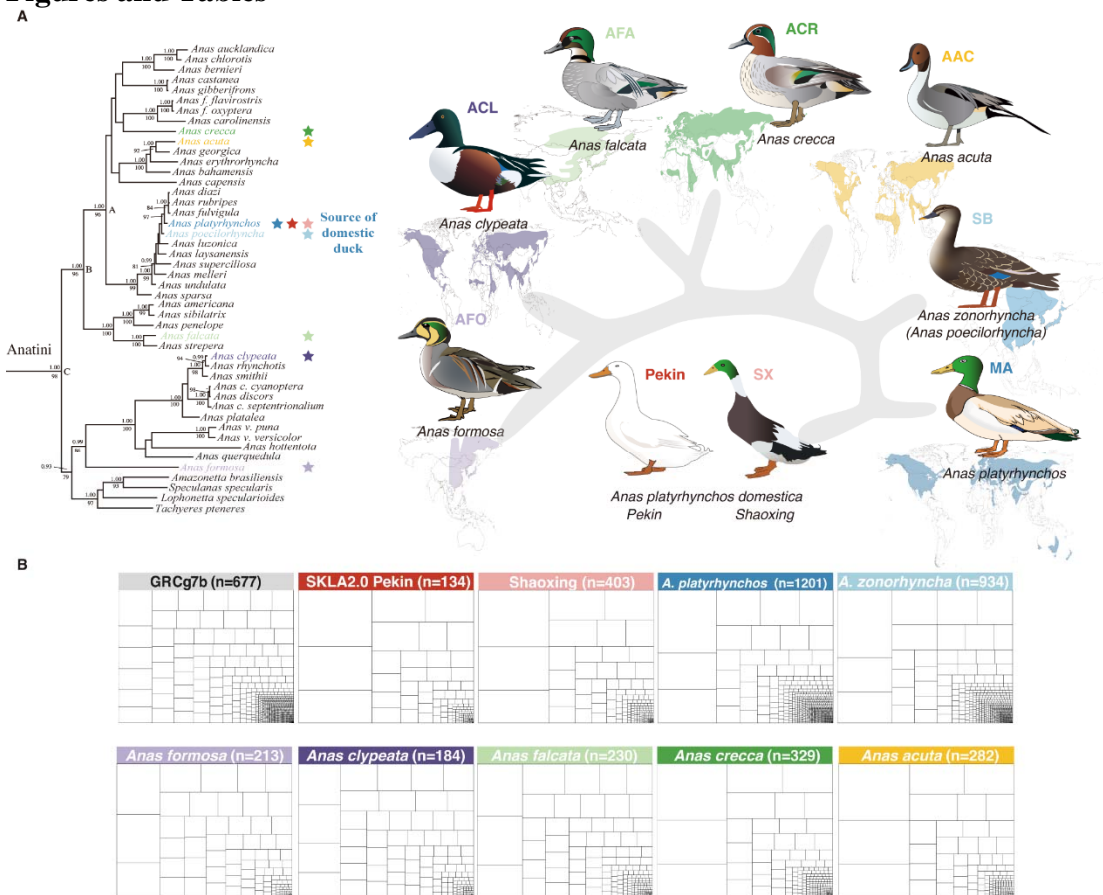

852  
 853 **Figure 1. Species information and genome assembly treemaps.** (A) Geographic  
 854 distributions of nine (two domestic and seven wild) duck species and their male plumage  
 855 during the breeding season. Source data for geographic distributions were collected from  
 856 <https://www.iucnredlist.org/>. The Anatini phylogenetic tree in the left side and grey graph  
 857 in the right side represented the phylogenetic relationships of nine ducks, which were  
 858 collected from Gonzalez (Gonzalez et al. 2009) (full phylogeny available in *SI Appendix*,  
 859 Fig. S1). *Anas zonorhyncha* was formerly considered a subspecies of *Anas*  
 860 *poecilorhyncha*. (B) Contig treemaps of eight newly duck assemblies, the GRCg7b  
 861 chicken genome and SKLA2.0 Pekin duck genome.

862

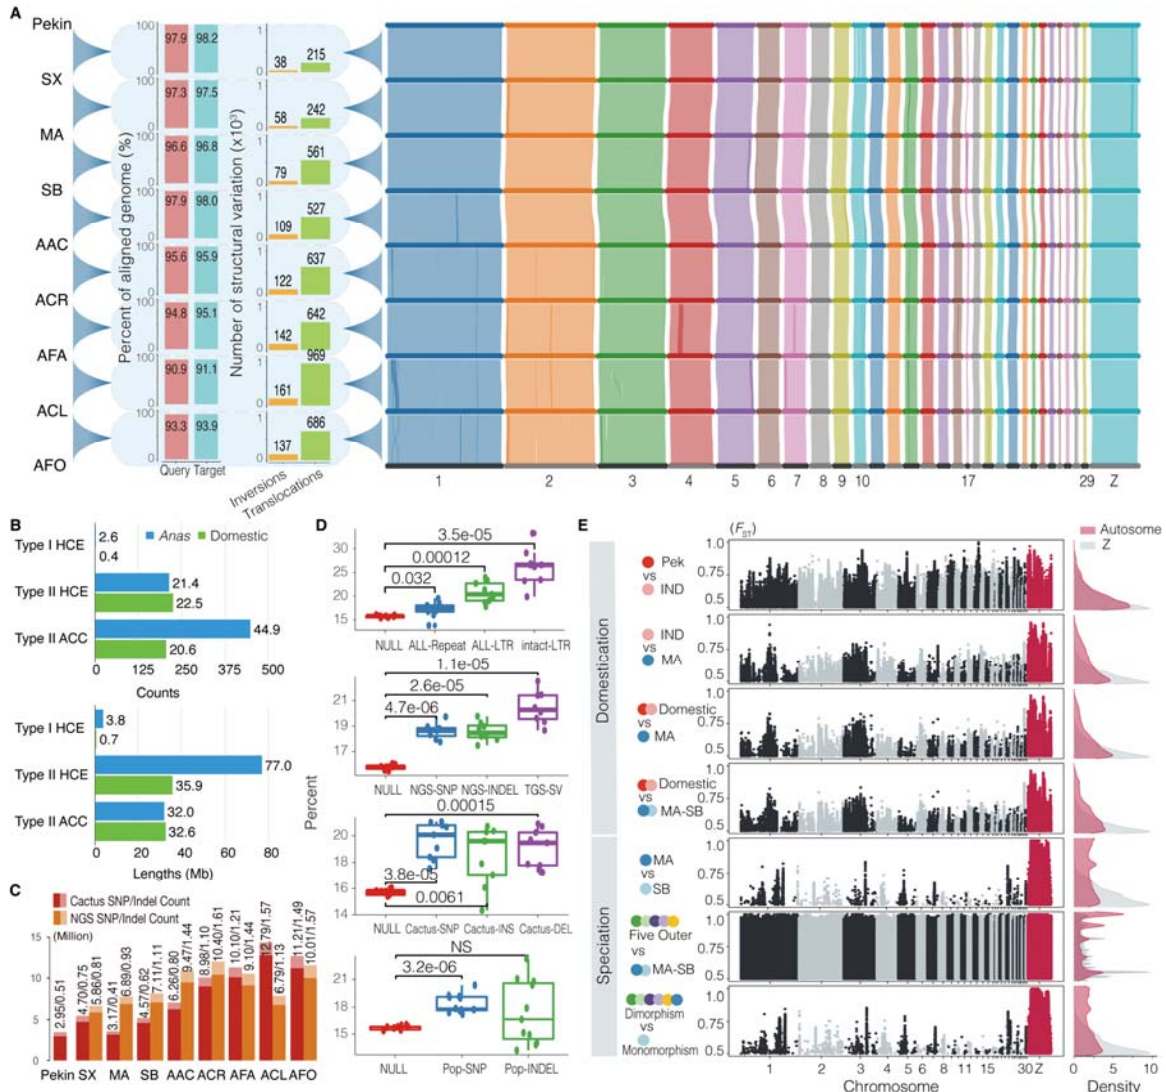

863

864 **Figure 2. Synteny, variation, and divergence of nine *Anas* genomes.** (A) The left side  
 865 shows percentage coverage and number of structural variations between genomes, and  
 866 the right side displays gene synteny of nine duck genomes from chr1 to chr29 and Z  
 867 chromosome. Each alignment depicts the upper as the “Target” and the lower as the  
 868 “Query”. (B) Statistics on HCEs (highly conserved elements) and ACCs (accelerated  
 869 evolution elements) in both *Anas* and domestic ducks. (C) Comparison of variation  
 870 detected with NGS data (NGS) and whole genome alignment (Cactus) in nine duck  
 871 individuals. (D) Comparison in percentages of different variations in the 0-10 kb gene  
 872 flanking region to percentages of the 0-10 kb gene flanking region in nine *Anas* genomes.  
 873 Significance levels were calculated using a paired two-sided t-test (n=9). (E) Landscape  
 874 of genomic divergence ( $F_{ST}$ ) in seven species pairs. The Five Outers are AAC, ACR, AFA,  
 875 ACL, and AFO; Monomorphism refers SB, while dimorphism includes MA, AAC, ACR,  
 876 AFA, ACL, and AFO.

877

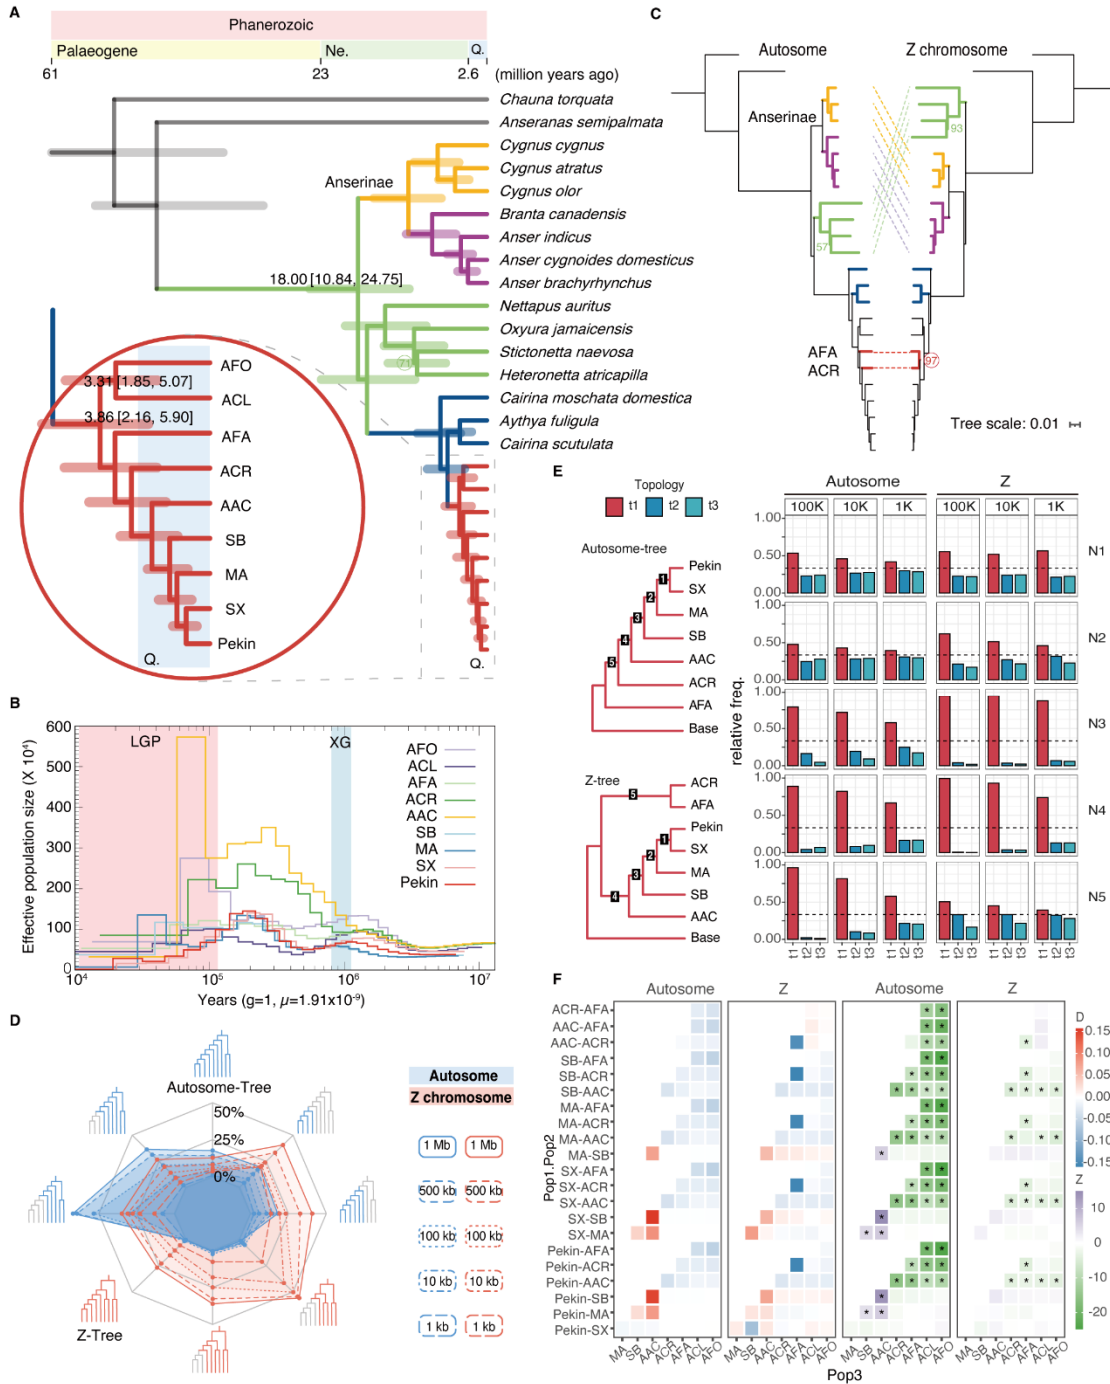

878

879 **Figure 3. *Anas* phylogeny and extensive phylogenetic incongruence.** (A) The Anatidae  
880 tree comprising nine *Anas* and 16 non-*Anas* species. The 95% highest posterior density  
881 (HPD) interval is shown after the divergence time. Bootstrap values below 100 are  
882 indicated next to the respective node. (B) PSMC estimation of nine duck genomes, with  
883 the pink shade denoting the last glacial period (LGP) and cyan shade denoting the  
884 Xixiabangma glacial (XG). (C) Two autosome-Z conflicts: (1) The relative position of the  
885 non-*Anas* duck lineage (green line) and Anserinae lineage (yellow and purple line); (2)

37

886 The relationship between ACR and AFA (red line). Bootstrap values below 100 are  
887 indicated next to the respective node. (D) Comparison of autosome and Z chromosome  
888 gene trees under different window sizes (1,000, 500, 100, 10, and 1 kb). The value in  
889 each corner corresponds to the adjacent topology. The gray part of the topology indicates  
890 that it was excluded during the statistical analysis. (E) Supports for three topologies on  
891 five nodes of autosome and Z chromosome tree by 100, 10, and 1 kb gene trees. (F) *D*-  
892 stat of *Anas* genomes for gene flow detection, using *Anser brachyrhynchus* as the  
893 outgroup (pop4). The grids filled with asterisks (\*) indicate that *Z* is greater than or  
894 smaller than 3.  
895

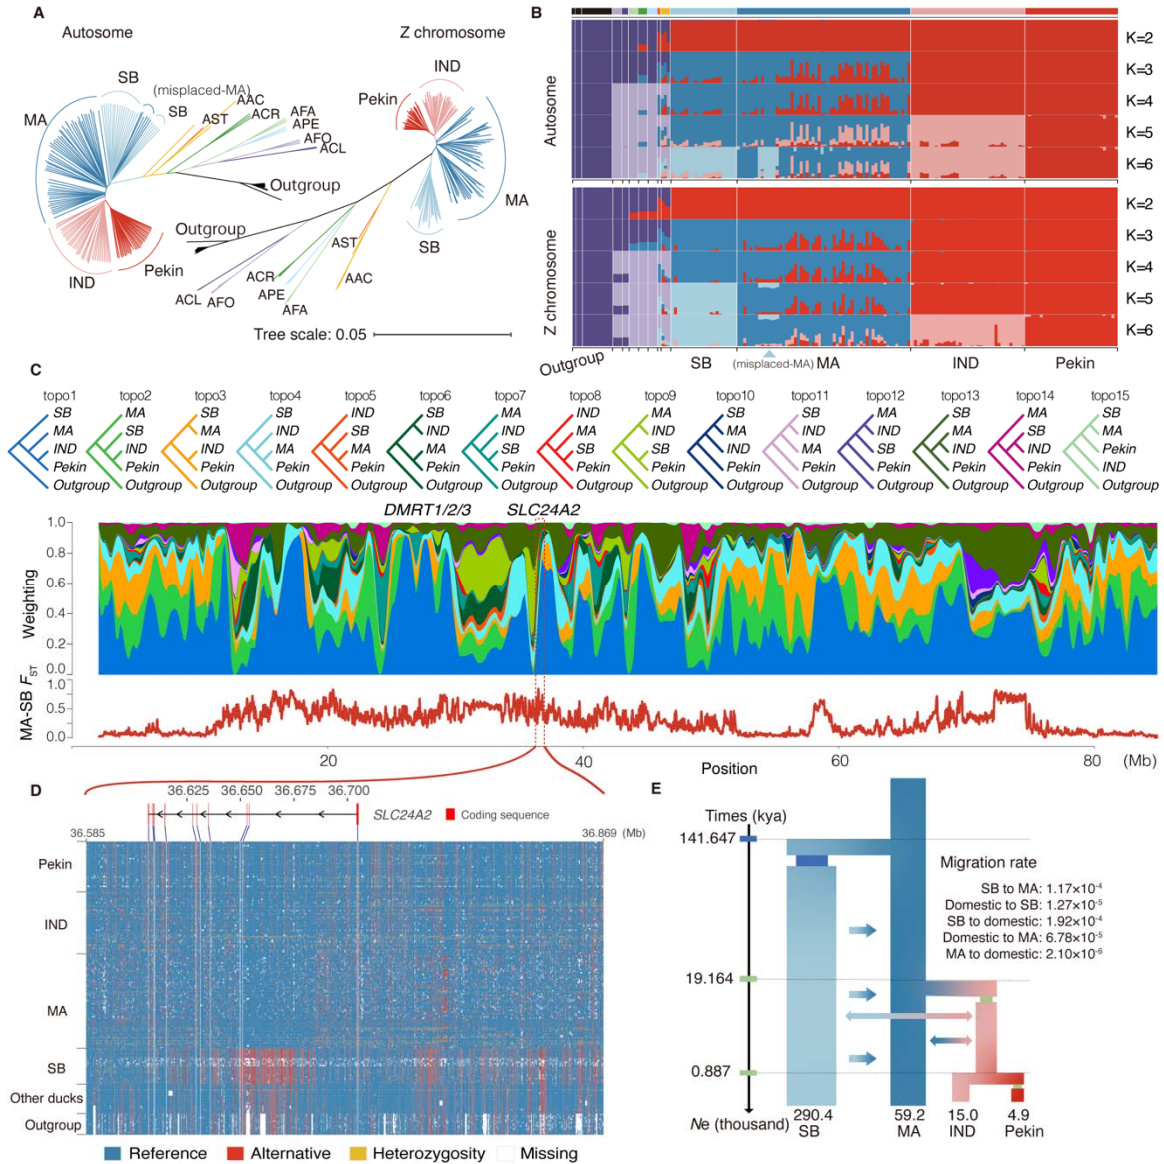

896

897 **Figure 4. Autosome-Z chromosome comparison and domestication model.** (A)  
 898 Neighbor-joining tree of 180 samples from 22 duck species/breeds, goose and swan based  
 899 on autosome and Z chromosome data. Different colors represent different duck  
 900 species/breeds, while geese and swans are indicated with black lines as outgroups. IND:  
 901 indigenous ducks, AST: *Anas strepera*, APE: *Anas penelope*. (B) ADMIXTURE results  
 902 using autosome and Z chromosome data, with K=2-7. The color-coded grids at the top  
 903 correspond to different groups as depicted in (A). (C) Topology weighting over the Z  
 904 chromosome using 5,000-site sliding windows. The “O” are other *Anas* species except  
 905 Pek, IND, MA, and SB. The different colored topologies in the bar plot correspond to the  
 906 fifteen topologies indicated at the top. Genes overlapping with low-introgression regions  
 907 are marked at the top of the bar plot. The bottom plot displays weighted  $F_{ST}$  values  
 908 between MA and SB over the Z chromosome at 50 kb sliding windows. (D) SNP  
 909 genotypes of the *SLC24A2* gene region in the 180 samples. (E) Best model estimated

39

910 demographic scenario for duck domestication. Three time points, from top to bottom,  
911 represent MA-SB splitting, domestication, and Pekin formation events.  
912



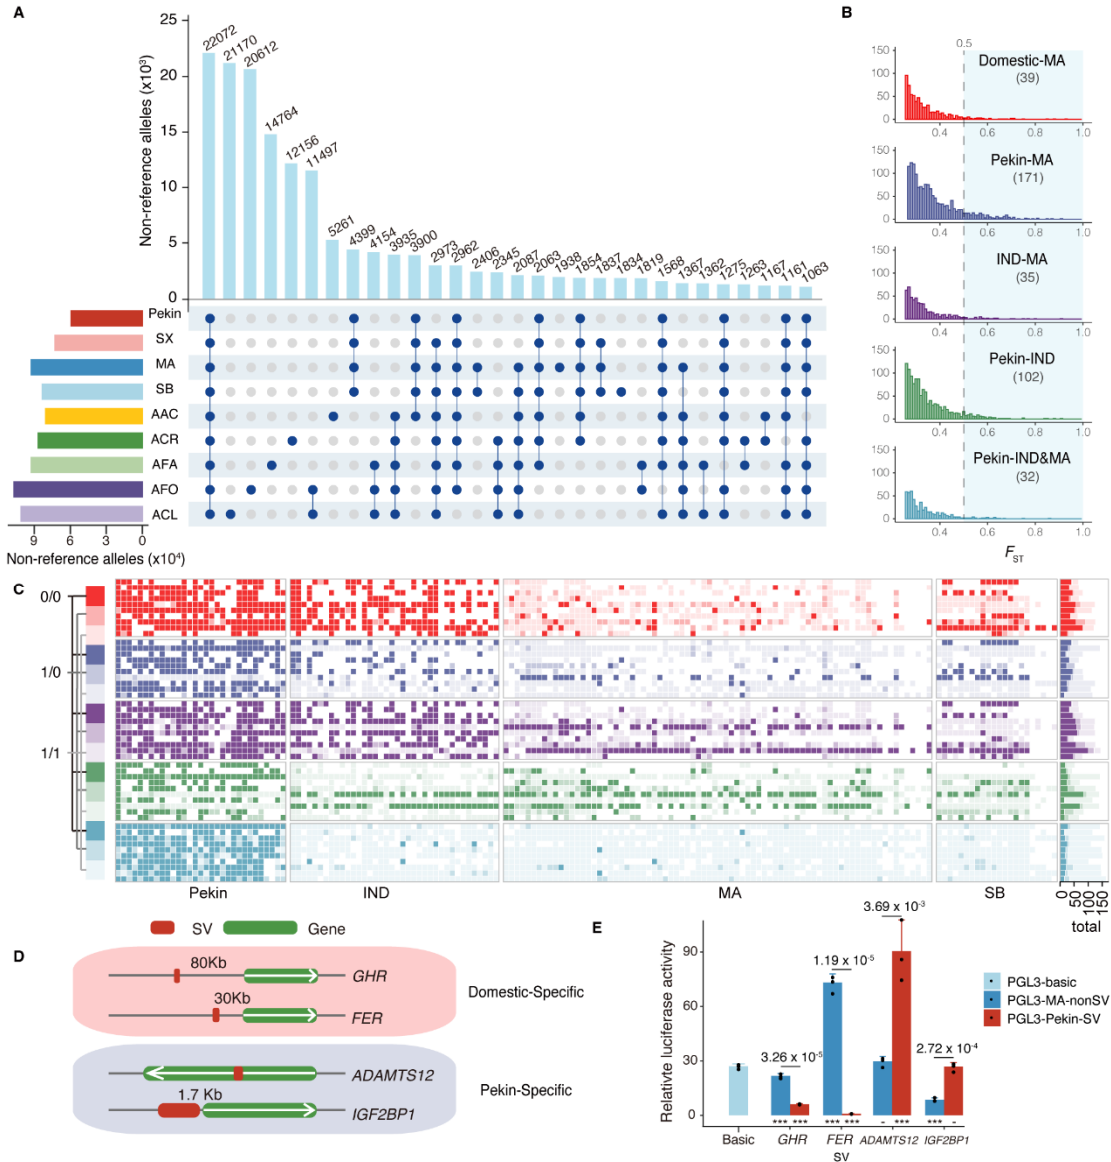

913

914 **Figure 5. SVs distribution in ducks and their effect on gene expression.** (A) Counts  
 915 and overlaps of SVs among Pekin, IND, MA, and SB populations. (B) Distribution of  $F_{ST}$   
 916 values for SV differentiation among five population groups. (C) Genotype of SVs with  
 917 the top10  $F_{ST}$  values in five comparison pairs. (D) Relative positions of four highly  
 918 divergent SVs and their nearby genes. (E) The dual-luciferase reporter assay of four  
 919 highly divergent SVs in (D) in DF-1 cells. Data are presented as mean  $\pm$  s.d. of Pekin  
 920 duck allele and MA allele at these four SV loci. The  $p$  values above each bar plot indicate  
 921 significant differences between Pekin duck allele (SV) and MA allele (Non-SV). The  
 922 asterisks at the bottom represent significant differences between vector with Pekin duck  
 923 allele and MA allele (two-sided t-test, three replicates for each group, \*\*\*  $p$  value <  
 924 0.001).

925

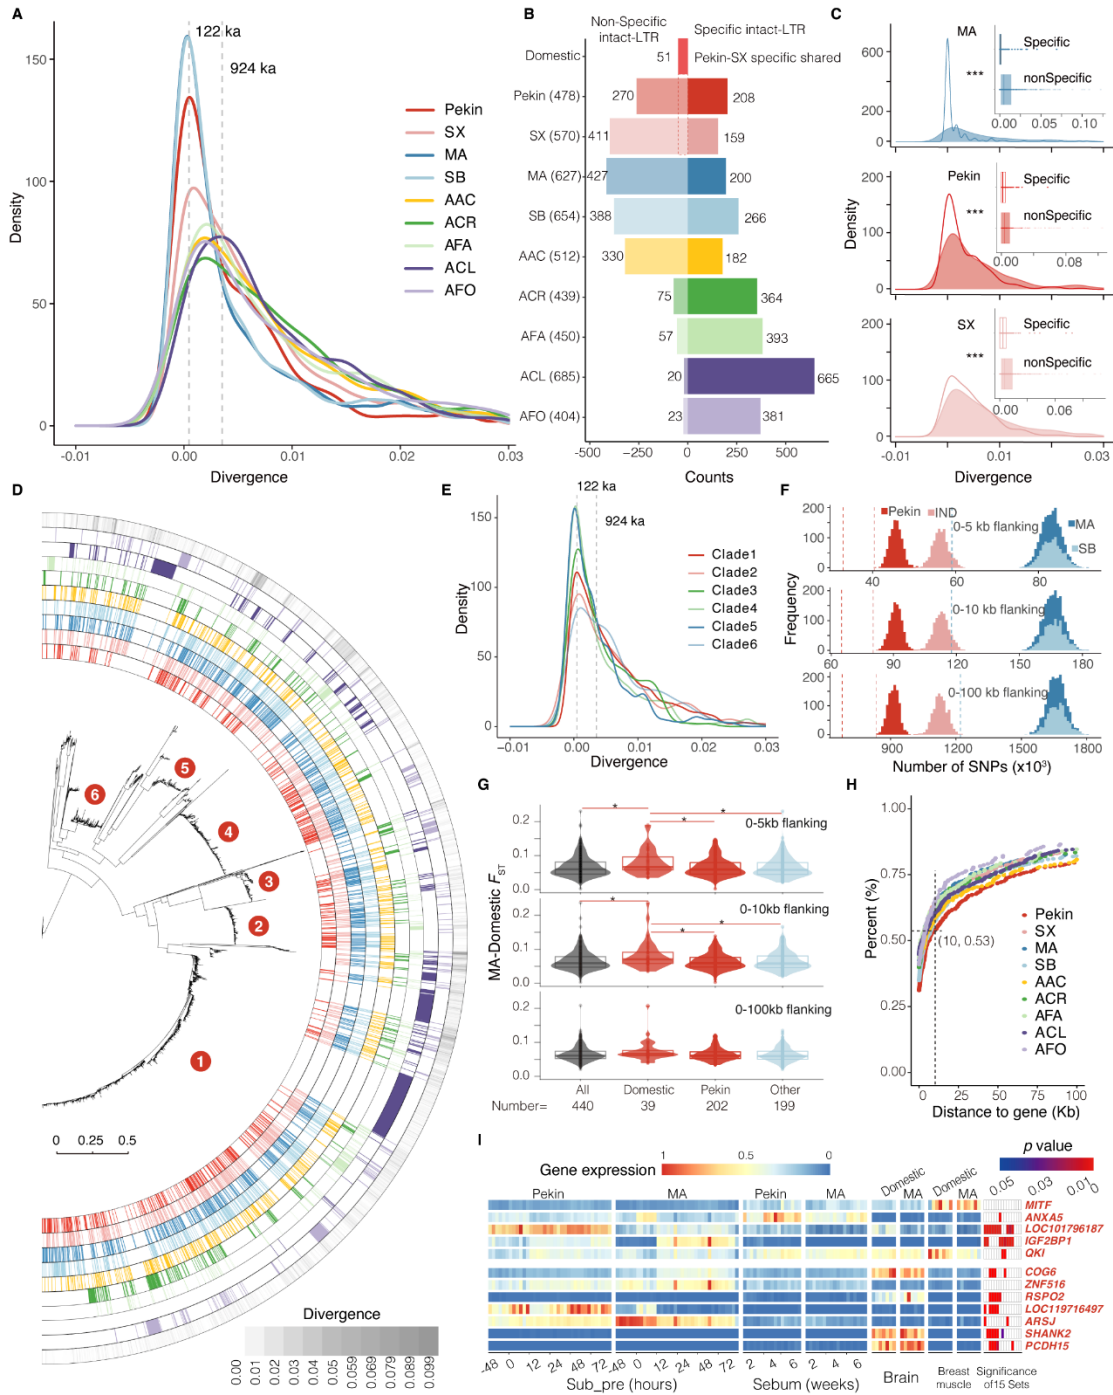

926

927 **Figure 6. LTR-RT burst in *Anas* genomes and its effect on gene expression.** (A)  
928 Distribution of LTR sequence divergence. Ages at two peaks were converted from peak  
929 values based on a mutation rate of  $1.9 \times 10^{-9}$  substitutions per site per year. (B) Category  
930 and number of intact-LTRs. (C) Distribution of LTR sequence divergence for two types  
931 of intact-LTRs; \*\*\* indicates  $p$  value  $< 0.001$ . (D) Phylogenetic tree based on two-sided  
932 LTR sequences of intact-LTRs. The outermost circle represents the degree of LTR  
933 sequence divergence, and the inwards represent the LTR positions of the different species.

42

934 (E) Distribution of LTR sequence divergence from six clades in (D). (F) Comparison of  
935 actual SNP frequency (dash line) in the flanking regions (0-5, 0-10, and 0-100 kb) of  
936 intact-LTRs and the distribution of SNPs frequency (histogram) when the flanking  
937 regions of intact-LTRs in four duck specie were randomly permuted among genomes for  
938 1,000 times. (G) Mean SNP divergence ( $F_{ST}$ ) at the flanking regions (0-5, 0-10, and 0-  
939 100 kb) of each LTR from four types of Pekin intact-LTRs; \* indicates  $p$  value  $<0.05$ . (H)  
940 Cumulative plot showing the percentage of intact-LTRs to gene distance. (I) Normalized  
941 FPKM values and  $p$  values for differential expression of genes of interest.

942

943
